# Supplementary material for: Graphene oxide/lysine composite – a potent electron mediator for detection of diazepam
Source: Royal Society of Chemistry journal article supplement (doi:10.1039/c8ay01429a), 2018-01-01
Supplement: c8ay01429a1.pdf [file c8ay01429a1.pdf]

### Supplementary Information

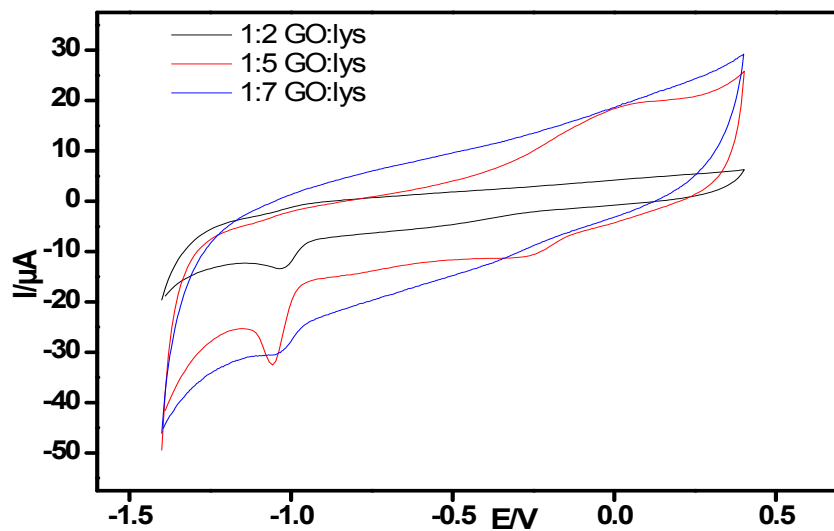

Figure S1: cyclic voltammogram showing electro catalytic behaviour shown by GO/lys composite with

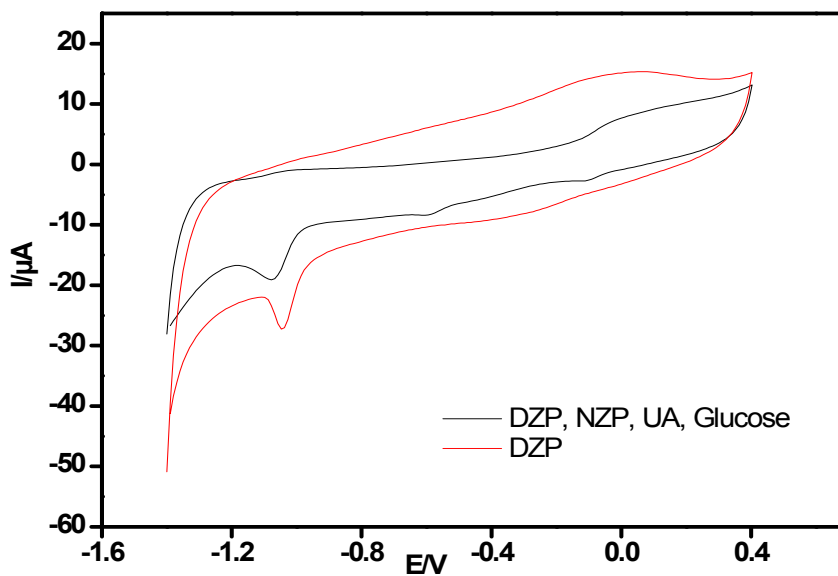

Figure S2: cyclic voltammogram showing interference studies for the detection of DZP in the presence of nitrazepam (NZP), uric acid (UA) and glucose (0.1 mg/ml)

**Table S1: Table depicting the values of  $Z_w$ ,  $R_{ct}$ ,  $C_{dl}$ ,  $R_s$  and  $Q$  for different electrodes**

| <b>Electrode</b> | <b><math>Z_w</math></b> | <b><math>R_{ct}</math></b> | <b><math>C_{dl}</math></b> | <b><math>R_s</math></b> | <b><math>Q</math></b> |
|------------------|-------------------------|----------------------------|----------------------------|-------------------------|-----------------------|
| Bare GCE         | 4834                    | 329.1                      | $1.2 \times 10^{-6}$       | 106.6                   | 0.000631              |
| GO/GCE           | 6335                    | 2183                       | $1.49 \times 10^{-6}$      | 97.83                   | 0.000140              |
| lys/GCE          | 7224                    | 1509                       | $6.57 \times 10^{-7}$      | 78.02                   | 0.000444              |
| GO/lys/GCE       | 982.7                   | 1175                       | $4.65 \times 10^{-7}$      | 57.49                   | 0.000631              |
